# Supplementary material
Source: Springer Nature journal article supplement (https://www.springermedizin.de/resource/supplementary/12960_2006_68_MOESM1_ESM.pdf/9570360)
Supplement: MOESM1 [file 9570360]

Overall government policy, including the National Development Plan

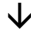

Health policy, including HR planning for health



Health institutions: the Ministry, districts and training institutions



Deployment of health staff and the 'skills mix'
